# Supplementary material
Source: PubMed Central journal article supplement (PMC7523908)
Supplement: ijes-13-4-567-s1.pdf [file ijes-13-4-567-s1.pdf]

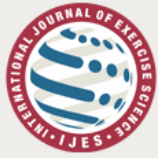

Supplemental Material

**Efficiency of the Wilks and IPF Formulas at Comparing Maximal Strength Regardless of Bodyweight through Analysis of the Open Powerlifting Database**

**Table 1.** Women's Classic Absolute Weight Lifted, Ratios and % of the Lift on the Total

| Category          |           | S (kg) | B (kg) | D (kg) | T (kg) | SR  | BR  | DR  | TR  | S%   | B%   | D%   |
|-------------------|-----------|--------|--------|--------|--------|-----|-----|-----|-----|------|------|------|
| -47kg<br>n = 189  | Max       | 142.5  | 82.5   | 182.5  | 397.5  | 3.2 | 1.8 | 4.1 | 9.0 | 43.6 | 29.8 | 54.4 |
|                   | $\bar{x}$ | 87.9   | 51.8   | 112.6  | 252.3  | 1.9 | 1.1 | 2.4 | 5.5 | 34.8 | 20.5 | 44.7 |
|                   | SD        | 19.0   | 12.7   | 22.3   | 49.8   | 0.4 | 0.3 | 0.5 | 1.1 | 2.7  | 2.6  | 3.1  |
|                   | Min       | 40.0   | 22.5   | 65.0   | 132.5  | 0.9 | 0.5 | 1.4 | 2.8 | 26.2 | 11.9 | 34.0 |
| -52kg<br>n = 524  | Max       | 152.5  | 105.0  | 185.0  | 407.5  | 3.0 | 2.1 | 3.6 | 8.0 | 43.2 | 29.0 | 54.3 |
|                   | $\bar{x}$ | 96.3   | 55.1   | 120.0  | 271.3  | 1.9 | 1.1 | 2.4 | 5.3 | 35.5 | 20.2 | 44.3 |
|                   | SD        | 19.1   | 12.8   | 21.8   | 49.2   | 0.4 | 0.3 | 0.4 | 1.0 | 2.6  | 2.4  | 3.0  |
|                   | Min       | 45.0   | 25.0   | 50.0   | 125.0  | 0.9 | 0.5 | 1.0 | 2.6 | 27.7 | 13.0 | 36.0 |
| -57kg<br>n = 998  | Max       | 172.5  | 102.5  | 207.5  | 453.0  | 3.1 | 1.8 | 3.7 | 8.0 | 51.7 | 34.2 | 58.2 |
|                   | $\bar{x}$ | 102.3  | 58.7   | 126.9  | 287.8  | 1.8 | 1.1 | 2.3 | 5.2 | 35.4 | 20.4 | 44.2 |
|                   | SD        | 21.1   | 12.8   | 22.6   | 51.5   | 0.4 | 0.2 | 0.4 | 0.9 | 2.8  | 2.5  | 3.2  |
|                   | Min       | 35.0   | 30.0   | 25.0   | 132.5  | 0.7 | 0.5 | 0.4 | 2.4 | 20.9 | 12.8 | 17.2 |
| -63kg<br>n = 1585 | Max       | 188.0  | 120.0  | 225.5  | 500.5  | 3.0 | 1.9 | 3.6 | 8.1 | 43.0 | 34.6 | 55.1 |
|                   | $\bar{x}$ | 107.3  | 61.1   | 131.7  | 300.1  | 1.8 | 1.0 | 2.1 | 4.9 | 35.7 | 20.3 | 44.0 |
|                   | SD        | 22.2   | 13.9   | 23.7   | 55.4   | 0.4 | 0.2 | 0.4 | 0.9 | 2.4  | 2.3  | 2.8  |
|                   | Min       | 42.5   | 30.0   | 60.0   | 135.0  | 0.7 | 0.5 | 1.0 | 2.3 | 26.0 | 13.4 | 33.1 |
| -72kg<br>n = 2064 | Max       | 203.0  | 125.0  | 242.5  | 540.0  | 2.8 | 1.8 | 3.5 | 7.8 | 48.4 | 42.1 | 58.0 |
|                   | $\bar{x}$ | 113.9  | 64.1   | 138.2  | 316.2  | 1.7 | 0.9 | 2.0 | 4.6 | 35.9 | 20.3 | 43.8 |
|                   | SD        | 24.1   | 14.4   | 25.6   | 59.3   | 0.3 | 0.2 | 0.4 | 0.8 | 2.7  | 2.4  | 2.9  |
|                   | Min       | 15.9   | 22.7   | 52.2   | 90.7   | 0.2 | 0.3 | 0.8 | 1.3 | 17.5 | 13.6 | 26.9 |
| -84kg<br>n = 1421 | Max       | 205.0  | 135.0  | 242.5  | 542.5  | 2.6 | 1.6 | 3.0 | 6.8 | 47.3 | 51.0 | 54.1 |
|                   | $\bar{x}$ | 119.0  | 66.0   | 142.9  | 327.9  | 1.5 | 0.8 | 1.8 | 4.1 | 36.1 | 20.1 | 43.7 |
|                   | SD        | 26.6   | 14.9   | 26.1   | 62.7   | 0.3 | 0.2 | 0.3 | 0.8 | 2.9  | 2.5  | 2.9  |
|                   | Min       | 20.0   | 30.0   | 40.0   | 122.5  | 0.3 | 0.4 | 0.5 | 1.5 | 11.9 | 12.8 | 25.9 |
| 84+kg<br>n = 1086 | Max       | 255.0  | 132.5  | 251.0  | 611.0  | 2.4 | 1.4 | 2.5 | 6.1 | 46.7 | 33.9 | 55.6 |
|                   | $\bar{x}$ | 130.1  | 71.5   | 149.8  | 351.4  | 1.3 | 0.7 | 1.5 | 3.5 | 36.7 | 20.4 | 42.9 |
|                   | SD        | 34.0   | 17.8   | 29.0   | 75.2   | 0.3 | 0.2 | 0.3 | 0.7 | 3.3  | 2.5  | 3.2  |
|                   | Min       | 25.0   | 31.8   | 55.0   | 157.5  | 0.2 | 0.3 | 0.6 | 1.3 | 13.9 | 12.4 | 33.3 |

S: Squat, B: Bench, D: Deadlift, T: Total, SR: Squat Ratio, BR: Bench Ratio, DR: Deadlift Ratio, TR: Total Ratio, S%: Squat percentage on the total, B%: Bench press percentage on the total, D%: Deadlift percentage on the total

**Table 2.** Women’s Classic Wilks and IPF Formula points

| Category          |           | SW    | BW    | DW    | TW    | SIPF  | BIPF  | DIPF  | TIPF  |
|-------------------|-----------|-------|-------|-------|-------|-------|-------|-------|-------|
| -47kg<br>n = 189  | Max       | 200.3 | 111.9 | 256.6 | 558.9 | 847.1 | 755.3 | 839.9 | 845.5 |
|                   | $\bar{x}$ | 120.0 | 70.8  | 153.7 | 344.5 | 501.4 | 498.1 | 497.3 | 502.5 |
|                   | SD        | 25.7  | 17.2  | 30.2  | 67.1  | 109.4 | 107.3 | 103.7 | 108.8 |
| -52kg<br>n = 524  | Max       | 53.9  | 30.3  | 90.2  | 178.6 | 223.1 | 247.6 | 277.8 | 237.1 |
|                   | $\bar{x}$ | 193.3 | 133.5 | 232.2 | 514.2 | 811.7 | 906.7 | 796.6 | 791.6 |
|                   | SD        | 122.1 | 69.8  | 152.2 | 344.1 | 518.6 | 504.0 | 509.6 | 515.7 |
| -57kg<br>n = 998  | Max       | 24.0  | 16.2  | 27.4  | 61.8  | 99.0  | 102.8 | 97.2  | 100.1 |
|                   | $\bar{x}$ | 59.2  | 31.2  | 65.8  | 164.5 | 251.7 | 260.8 | 200.1 | 218.8 |
|                   | SD        | 201.4 | 119.8 | 244.5 | 525.7 | 851.3 | 844.5 | 867.7 | 831.9 |
| -63kg<br>n = 1585 | Max       | 120.8 | 69.3  | 149.9 | 340.0 | 523.5 | 514.1 | 520.4 | 524.4 |
|                   | $\bar{x}$ | 24.6  | 14.9  | 26.3  | 59.8  | 100.1 | 97.1  | 97.0  | 98.0  |
|                   | SD        | 43.2  | 35.0  | 29.1  | 157.7 | 200.0 | 292.9 | 79.4  | 226.2 |
| -72kg<br>n = 2064 | Max       | 204.7 | 129.1 | 245.4 | 544.8 | 872.3 | 933.8 | 908.2 | 881.7 |
|                   | $\bar{x}$ | 117.7 | 67.0  | 144.5 | 329.2 | 522.9 | 513.6 | 521.0 | 523.7 |
|                   | SD        | 24.0  | 15.0  | 25.6  | 59.7  | 96.7  | 100.7 | 98.0  | 99.1  |
| -84kg<br>n = 1421 | Max       | 47.3  | 33.4  | 67.1  | 150.9 | 237.8 | 287.9 | 224.7 | 226.3 |
|                   | $\bar{x}$ | 198.3 | 124.3 | 243.6 | 542.5 | 859.8 | 919.7 | 939.3 | 901.1 |
|                   | SD        | 114.7 | 64.6  | 139.1 | 318.3 | 523.5 | 513.7 | 524.1 | 524.6 |
| 84+kg<br>n = 1086 | Max       | 23.7  | 14.3  | 25.1  | 58.1  | 94.7  | 98.7  | 100.6 | 98.2  |
|                   | $\bar{x}$ | 16.0  | 22.9  | 52.7  | 91.5  | 130.8 | 227.6 | 181.5 | 144.3 |
|                   | SD        | 187.7 | 121.4 | 221.9 | 496.4 | 821.5 | 934.8 | 890.5 | 844.6 |
| 84+kg<br>n = 1086 | Max       | 109.6 | 60.8  | 131.6 | 302.1 | 514.1 | 502.5 | 515.8 | 513.7 |
|                   | $\bar{x}$ | 23.8  | 13.5  | 23.4  | 56.0  | 93.9  | 95.5  | 97.2  | 95.5  |
|                   | SD        | 18.3  | 27.5  | 36.7  | 112.3 | 156.7 | 268.3 | 125.1 | 193.1 |
| 84+kg<br>n = 1086 | Max       | 201.5 | 107.5 | 197.8 | 482.0 | 813.2 | 837.8 | 787.4 | 793.8 |
|                   | $\bar{x}$ | 108.5 | 59.6  | 125.0 | 293.1 | 507.2 | 497.6 | 497.9 | 501.5 |
|                   | SD        | 27.2  | 14.3  | 23.3  | 59.9  | 99.2  | 99.3  | 97.3  | 97.9  |
| 84+kg<br>n = 1086 | Min       | 20.6  | 26.3  | 46.1  | 132.2 | 184.0 | 264.2 | 169.1 | 236.8 |

SW: Squat Wilks Points, BW: Bench press Wilks Points, DW: Deadlift Wilks Points, SIPF: Squat IPF Points, BIPF: Bench press IPF Points, DIPF: Deadlift IPF Points, TIPF: Total IPF Points

**Table 3.** Women’s Equipped Absolute Weight Lifted, Ratios and % of the Lift on the Total

| Category         |           | S (kg) | B (kg) | D (kg) | T (kg) | SR  | BR  | DR  | TR   | S%   | B%   | D%   |
|------------------|-----------|--------|--------|--------|--------|-----|-----|-----|------|------|------|------|
| -47kg<br>n = 66  | Max       | 210.0  | 141.0  | 185.0  | 500.0  | 4.5 | 3.0 | 4.0 | 10.7 | 44.5 | 29.6 | 47.3 |
|                  | $\bar{x}$ | 128.0  | 70.4   | 127.4  | 325.9  | 2.8 | 1.5 | 2.8 | 7.0  | 39.1 | 21.4 | 39.5 |
|                  | SD        | 36.2   | 24.0   | 30.0   | 85.7   | 0.8 | 0.5 | 0.6 | 1.8  | 2.6  | 3.1  | 3.2  |
| -52kg<br>n = 137 | Min       | 40.0   | 30.0   | 40.0   | 110.0  | 0.9 | 0.6 | 0.9 | 2.4  | 31.2 | 15.0 | 33.3 |
|                  | Max       | 210.0  | 150.5  | 190.0  | 535.0  | 4.0 | 2.9 | 3.7 | 10.3 | 47.0 | 30.1 | 47.6 |
|                  | $\bar{x}$ | 131.0  | 76.6   | 134.1  | 341.6  | 2.6 | 1.5 | 2.6 | 6.7  | 38.1 | 22.3 | 39.6 |
| -57kg<br>n = 198 | SD        | 34.4   | 22.9   | 29.6   | 81.7   | 0.7 | 0.4 | 0.6 | 1.6  | 2.7  | 3.0  | 3.1  |
|                  | Min       | 45.0   | 30.0   | 50.0   | 135.0  | 0.9 | 0.6 | 1.0 | 2.6  | 30.1 | 15.9 | 30.1 |
|                  | Max       | 225.0  | 150.0  | 205.0  | 565.0  | 4.0 | 2.7 | 3.8 | 10.1 | 45.5 | 41.7 | 50.6 |
| -63kg<br>n = 231 | $\bar{x}$ | 141.8  | 82.9   | 144.9  | 369.7  | 2.5 | 1.5 | 2.6 | 6.6  | 38.1 | 22.3 | 39.6 |
|                  | SD        | 36.9   | 23.8   | 28.9   | 84.5   | 0.7 | 0.4 | 0.5 | 1.5  | 2.9  | 3.0  | 3.3  |
|                  | Min       | 60.0   | 35.0   | 70.0   | 170.0  | 1.1 | 0.6 | 1.2 | 3.0  | 29.1 | 13.9 | 29.1 |
| -72kg<br>n = 266 | Max       | 241.0  | 180.0  | 225.0  | 641.0  | 3.8 | 2.9 | 3.7 | 10.2 | 44.5 | 48.7 | 53.1 |
|                  | $\bar{x}$ | 146.9  | 86.8   | 149.5  | 383.2  | 2.4 | 1.4 | 2.4 | 6.2  | 38.0 | 22.5 | 39.5 |
|                  | SD        | 41.9   | 28.8   | 32.6   | 97.7   | 0.7 | 0.5 | 0.5 | 1.6  | 3.3  | 3.6  | 3.3  |
| -84kg<br>n = 164 | Min       | 35.0   | 30.0   | 50.0   | 115.0  | 0.6 | 0.5 | 0.8 | 1.9  | 20.5 | 14.2 | 30.8 |
|                  | Max       | 274.0  | 186.0  | 245.0  | 680.0  | 3.9 | 2.6 | 3.5 | 9.7  | 43.5 | 33.9 | 50.6 |
|                  | $\bar{x}$ | 158.8  | 96.2   | 160.1  | 415.0  | 2.3 | 1.4 | 2.3 | 6.0  | 38.0 | 22.8 | 39.2 |
| 84+kg<br>n = 120 | SD        | 44.9   | 32.5   | 33.5   | 105.2  | 0.6 | 0.5 | 0.5 | 1.5  | 2.9  | 3.3  | 3.8  |
|                  | Min       | 30.0   | 30.0   | 45.0   | 105.0  | 0.4 | 0.4 | 0.7 | 1.6  | 23.1 | 14.9 | 30.3 |
|                  | Max       | 275.5  | 185.0  | 245.0  | 671.0  | 3.4 | 2.2 | 3.2 | 8.5  | 45.8 | 34.5 | 51.2 |
| 84+kg<br>n = 120 | $\bar{x}$ | 175.4  | 105.8  | 168.3  | 449.6  | 2.2 | 1.3 | 2.1 | 5.6  | 38.7 | 23.2 | 38.0 |
|                  | SD        | 47.1   | 33.4   | 32.6   | 106.0  | 0.6 | 0.4 | 0.4 | 1.3  | 2.8  | 3.5  | 3.9  |
|                  | Min       | 60.0   | 40.0   | 80.0   | 200.0  | 0.8 | 0.5 | 1.0 | 2.6  | 30.0 | 14.0 | 30.0 |
| 84+kg<br>n = 120 | Max       | 325.0  | 220.0  | 271.0  | 793.0  | 3.1 | 2.0 | 2.6 | 7.3  | 49.5 | 38.1 | 51.1 |
|                  | $\bar{x}$ | 182.7  | 112.3  | 171.1  | 466.1  | 1.8 | 1.1 | 1.7 | 4.6  | 38.8 | 23.8 | 37.5 |
| 84+kg<br>n = 120 | SD        | 56.2   | 39.4   | 36.0   | 121.9  | 0.5 | 0.4 | 0.4 | 1.2  | 3.7  | 4.3  | 4.6  |
|                  | Min       | 67.5   | 35.0   | 80.0   | 210.0  | 0.6 | 0.4 | 0.9 | 2.0  | 27.0 | 12.6 | 27.5 |

S: Squat, B: Bench, D: Deadlift, T: Total, SR: Squat Ratio, BR: Bench Ratio, DR: Deadlift Ratio, TR: Total Ratio, S%: Squat percentage on the total, B%: Bench press percentage on the total, D%: Deadlift percentage on the total

**Table 4.** Women's Equipped Wilks and IPF Formula points

| Category         |           | SW    | BW    | DW    | TW    | SIPF  | BIPF  | DIPF  | TIPF  |
|------------------|-----------|-------|-------|-------|-------|-------|-------|-------|-------|
| -47kg<br>n = 66  | Max       | 283.5 | 190.9 | 249.8 | 675.0 | 847.1 | 854.6 | 839.9 | 754.8 |
|                  | $\bar{x}$ | 174.0 | 95.7  | 173.1 | 442.8 | 511.7 | 506.1 | 499.6 | 528.9 |
|                  | SD        | 48.9  | 32.4  | 40.6  | 115.8 | 111.5 | 108.9 | 105.3 | 112.4 |
| -52kg<br>n = 137 | Max       | 54.3  | 40.5  | 54.3  | 149.3 | 223.1 | 247.6 | 184.2 | 244.1 |
|                  | Max       | 262.0 | 188.0 | 240.3 | 667.5 | 811.7 | 906.7 | 796.6 | 759.0 |
|                  | $\bar{x}$ | 165.2 | 96.6  | 169.2 | 430.9 | 520.0 | 509.7 | 510.0 | 524.7 |
| -57kg<br>n = 198 | SD        | 42.9  | 28.6  | 36.9  | 101.8 | 99.1  | 101.8 | 98.7  | 100.4 |
|                  | Min       | 56.6  | 37.7  | 63.9  | 169.8 | 251.7 | 260.8 | 200.1 | 268.4 |
|                  | Max       | 264.2 | 176.1 | 246.1 | 663.4 | 851.3 | 844.5 | 867.7 | 766.6 |
| -63kg<br>n = 231 | $\bar{x}$ | 166.7 | 97.5  | 170.4 | 434.6 | 525.5 | 517.8 | 522.4 | 537.6 |
|                  | SD        | 43.0  | 27.7  | 33.8  | 98.4  | 100.4 | 96.5  | 97.6  | 98.6  |
|                  | Min       | 69.9  | 41.1  | 81.6  | 198.1 | 200.0 | 292.9 | 79.4  | 301.9 |
| -72kg<br>n = 266 | Max       | 258.9 | 193.3 | 249.6 | 688.5 | 872.3 | 933.8 | 908.2 | 811.6 |
|                  | $\bar{x}$ | 160.6 | 94.9  | 163.5 | 419.0 | 523.5 | 515.8 | 522.4 | 532.4 |
|                  | SD        | 45.2  | 31.1  | 35.0  | 105.0 | 98.3  | 100.9 | 99.5  | 107.8 |
| -84kg<br>n = 164 | Min       | 38.5  | 32.3  | 53.8  | 126.6 | 235.2 | 287.9 | 193.5 | 233.6 |
|                  | Max       | 272.6 | 183.3 | 239.1 | 676.6 | 859.8 | 919.7 | 939.3 | 816.3 |
|                  | $\bar{x}$ | 159.1 | 96.4  | 160.6 | 416.1 | 524.7 | 516.6 | 526.4 | 542.0 |
| 84+kg<br>n = 120 | SD        | 44.4  | 32.2  | 33.4  | 104.1 | 96.5  | 99.6  | 101.7 | 109.3 |
|                  | Min       | 30.6  | 30.6  | 45.9  | 107.1 | 130.8 | 227.6 | 171.2 | 217.8 |
|                  | Max       | 248.2 | 165.4 | 231.2 | 619.6 | 821.5 | 934.8 | 890.5 | 769.2 |
| 84+kg<br>n = 120 | $\bar{x}$ | 160.8 | 97.0  | 154.4 | 412.1 | 517.3 | 506.7 | 519.0 | 548.3 |
|                  | SD        | 41.9  | 29.9  | 29.0  | 93.9  | 95.5  | 96.3  | 97.9  | 100.8 |
|                  | Min       | 58.3  | 38.1  | 72.3  | 189.7 | 156.7 | 268.3 | 125.1 | 311.9 |
| 84+kg<br>n = 120 | Max       | 254.6 | 173.8 | 216.0 | 621.3 | 813.2 | 837.8 | 787.4 | 736.0 |
|                  | $\bar{x}$ | 152.2 | 93.4  | 142.6 | 388.2 | 508.3 | 500.2 | 499.5 | 519.7 |
|                  | SD        | 45.7  | 31.9  | 29.0  | 98.2  | 100.3 | 99.1  | 97.8  | 101.9 |
| 84+kg<br>n = 120 | Min       | 54.9  | 30.9  | 69.0  | 181.1 | 184.0 | 264.2 | 169.1 | 303.3 |

SW: Squat Wilks Points, BW: Bench press Wilks Points, DW: Deadlift Wilks Points, SIPF: Squat IPF Points, BIPF: Bench press IPF Points, DIPF: Deadlift IPF Points, TIPF: Total IPF Points

**Table 5.** Men’s Classic Absolute Weight Lifted, Ratios and % of the Lift on the Total

| Category           |           | S (kg) | B (kg) | D (kg) | T (kg) | SR  | BR  | DR  | TR   | S%   | B%   | D%   |
|--------------------|-----------|--------|--------|--------|--------|-----|-----|-----|------|------|------|------|
| -59kg<br>n = 236   | Max       | 245.0  | 150.0  | 255.0  | 570.0  | 4.2 | 2.6 | 4.4 | 9.7  | 43.4 | 59.1 | 54.1 |
|                    | $\bar{x}$ | 141.6  | 97.5   | 175.5  | 414.7  | 2.5 | 1.7 | 3.0 | 7.2  | 33.9 | 23.6 | 42.5 |
|                    | SD        | 31.7   | 20.6   | 31.7   | 75.5   | 0.5 | 0.3 | 0.5 | 1.2  | 3.2  | 3.6  | 3.4  |
|                    | Min       | 34.0   | 37.5   | 45.0   | 152.0  | 0.7 | 0.6 | 0.8 | 3.1  | 19.2 | 16.1 | 21.6 |
| -66kg<br>n = 648   | Max       | 255.5  | 175.5  | 282.5  | 663.0  | 3.9 | 2.7 | 4.3 | 10.2 | 42.0 | 42.9 | 53.2 |
|                    | $\bar{x}$ | 160.7  | 110.1  | 195.5  | 466.3  | 2.5 | 1.7 | 3.0 | 7.2  | 34.4 | 23.6 | 42.0 |
|                    | SD        | 29.3   | 20.1   | 30.7   | 72.2   | 0.4 | 0.3 | 0.5 | 1.1  | 2.4  | 2.6  | 2.7  |
|                    | Min       | 40.0   | 35.0   | 70.3   | 155.0  | 0.7 | 0.6 | 1.1 | 2.6  | 21.9 | 16.6 | 28.6 |
| -74kg<br>n = 1723  | Max       | 283.0  | 210.5  | 312.5  | 790.5  | 4.0 | 2.9 | 4.3 | 10.7 | 41.2 | 44.2 | 62.4 |
|                    | $\bar{x}$ | 173.7  | 118.9  | 208.7  | 501.3  | 2.4 | 1.6 | 2.9 | 6.9  | 34.6 | 23.7 | 41.7 |
|                    | SD        | 31.3   | 21.5   | 32.0   | 77.3   | 0.4 | 0.3 | 0.4 | 1.0  | 2.2  | 2.5  | 2.6  |
|                    | Min       | 25.0   | 50.0   | 62.5   | 162.5  | 0.4 | 0.7 | 0.9 | 2.3  | 8.3  | 17.3 | 28.8 |
| -83kg<br>n = 3019  | Max       | 313.0  | 215.0  | 340.0  | 833.0  | 3.8 | 2.7 | 4.1 | 10.1 | 52.1 | 56.8 | 52.4 |
|                    | $\bar{x}$ | 187.9  | 127.5  | 221.5  | 536.9  | 2.3 | 1.6 | 2.7 | 6.6  | 34.9 | 23.8 | 41.3 |
|                    | SD        | 32.7   | 22.6   | 33.8   | 81.2   | 0.4 | 0.3 | 0.4 | 1.0  | 2.1  | 2.5  | 2.5  |
|                    | Min       | 25.0   | 25.0   | 45.4   | 95.3   | 0.3 | 0.3 | 0.6 | 1.2  | 20.1 | 7.5  | 20.7 |
| -93kg<br>n = 3531  | Max       | 330.0  | 225.0  | 355.5  | 842.5  | 3.6 | 2.5 | 3.8 | 9.6  | 43.6 | 57.7 | 56.5 |
|                    | $\bar{x}$ | 199.3  | 136.3  | 232.1  | 567.8  | 2.2 | 1.5 | 2.6 | 6.3  | 35.0 | 24.0 | 41.0 |
|                    | SD        | 35.4   | 23.9   | 35.2   | 86.5   | 0.4 | 0.3 | 0.4 | 0.9  | 2.2  | 2.5  | 2.4  |
|                    | Min       | 35.0   | 40.0   | 65.0   | 212.5  | 0.4 | 0.4 | 0.7 | 2.3  | 16.5 | 7.9  | 21.1 |
| -105kg<br>n = 2809 | Max       | 331.5  | 253.0  | 365.0  | 890.0  | 3.4 | 2.4 | 3.6 | 8.7  | 42.4 | 45.7 | 60.1 |
|                    | $\bar{x}$ | 213.8  | 145.8  | 243.8  | 603.5  | 2.1 | 1.4 | 2.4 | 6.0  | 35.4 | 24.2 | 40.5 |
|                    | SD        | 37.7   | 26.5   | 36.5   | 92.2   | 0.4 | 0.3 | 0.4 | 0.9  | 2.2  | 2.3  | 2.4  |
|                    | Min       | 25.0   | 60.0   | 65.0   | 195.0  | 0.3 | 0.6 | 0.7 | 2.0  | 6.5  | 16.2 | 27.1 |
| -120kg<br>n = 1512 | Max       | 382.5  | 250.0  | 372.5  | 945.0  | 3.2 | 2.1 | 3.2 | 7.9  | 49.5 | 58.1 | 49.4 |
|                    | $\bar{x}$ | 225.7  | 154.0  | 251.3  | 630.9  | 2.0 | 1.4 | 2.2 | 5.5  | 35.7 | 24.4 | 39.9 |
|                    | SD        | 42.9   | 29.6   | 40.3   | 103.1  | 0.4 | 0.2 | 0.3 | 0.9  | 2.5  | 2.6  | 2.8  |
|                    | Min       | 61.2   | 61.2   | 61.2   | 183.7  | 0.5 | 0.5 | 0.5 | 1.5  | 16.5 | 16.8 | 16.0 |
| 120+kg<br>n = 1001 | Max       | 490.0  | 277.5  | 417.5  | 1112.5 | 3.1 | 2.1 | 2.8 | 7.5  | 53.3 | 55.2 | 49.1 |
|                    | $\bar{x}$ | 243.1  | 165.2  | 259.9  | 668.3  | 1.8 | 1.2 | 1.9 | 4.9  | 36.2 | 24.7 | 39.1 |
|                    | SD        | 52.4   | 34.2   | 43.1   | 119.2  | 0.4 | 0.3 | 0.3 | 0.9  | 2.8  | 2.8  | 2.8  |
|                    | Min       | 50.0   | 52.5   | 87.5   | 260.0  | 0.4 | 0.3 | 0.6 | 1.7  | 12.4 | 12.7 | 19.0 |

S: Squat, B: Bench, D: Deadlift, T: Total, SR: Squat Ratio, BR: Bench Ratio, DR: Deadlift Ratio, TR: Total Ratio, S%: Squat percentage on the total, B%: Bench press percentage on the total, D%: Deadlift percentage on the total

**Table 6.** Men’s Classic Wilks and IPF Formula points

| Category           |           | SW    | BW    | DW    | TW    | SIPF  | BIPF  | DIPF  | TIPF  |
|--------------------|-----------|-------|-------|-------|-------|-------|-------|-------|-------|
| -59kg<br>n = 236   | Max       | 213.2 | 130.3 | 222.6 | 497.5 | 894.6 | 807.4 | 752.8 | 735.4 |
|                    | $\bar{x}$ | 125.6 | 86.5  | 155.8 | 367.8 | 521.7 | 534.7 | 502.5 | 519.6 |
|                    | SD        | 26.4  | 17.1  | 26.0  | 61.3  | 112.6 | 106.3 | 97.7  | 102.4 |
|                    | Min       | 35.3  | 32.5  | 39.7  | 160.2 | 138.7 | 198.5 | 77.7  | 179.6 |
| -66kg<br>n = 648   | Max       | 201.5 | 139.4 | 222.3 | 525.6 | 846.5 | 862.6 | 785.3 | 795.6 |
|                    | $\bar{x}$ | 128.2 | 87.8  | 156.0 | 372.0 | 535.1 | 542.5 | 526.1 | 538.0 |
|                    | SD        | 22.9  | 15.7  | 23.9  | 56.0  | 97.1  | 97.2  | 92.6  | 94.1  |
|                    | Min       | 34.1  | 29.9  | 55.4  | 132.2 | 134.4 | 182.2 | 139.8 | 133.9 |
| -74kg<br>n = 1723  | Max       | 208.1 | 152.5 | 225.3 | 570.0 | 874.5 | 939.7 | 823.6 | 881.7 |
|                    | $\bar{x}$ | 126.9 | 86.9  | 152.5 | 366.2 | 529.7 | 534.8 | 529.3 | 535.3 |
|                    | SD        | 22.4  | 15.4  | 22.9  | 55.0  | 94.6  | 95.1  | 91.8  | 93.4  |
|                    | Min       | 18.6  | 37.2  | 46.9  | 121.9 | 71.0  | 228.3 | 107.9 | 121.0 |
| -83kg<br>n = 3019  | Max       | 210.1 | 146.9 | 228.5 | 559.1 | 874.8 | 899.1 | 854.5 | 866.3 |
|                    | $\bar{x}$ | 127.5 | 86.5  | 150.3 | 364.4 | 529.5 | 528.5 | 532.2 | 535.0 |
|                    | SD        | 21.6  | 14.9  | 22.4  | 53.4  | 90.6  | 91.2  | 92.1  | 90.9  |
|                    | Min       | 17.2  | 17.2  | 31.1  | 65.4  | 66.0  | 104.1 | 44.6  | 26.4  |
| -93kg<br>n = 3531  | Max       | 207.8 | 142.4 | 223.8 | 541.4 | 852.2 | 857.1 | 844.9 | 835.0 |
|                    | $\bar{x}$ | 127.2 | 87.0  | 148.1 | 362.2 | 521.8 | 523.8 | 528.8 | 529.3 |
|                    | SD        | 22.1  | 15.0  | 22.0  | 53.9  | 91.2  | 89.7  | 91.7  | 91.1  |
|                    | Min       | 22.2  | 25.6  | 40.8  | 135.0 | 87.4  | 153.8 | 82.1  | 144.0 |
| -105kg<br>n = 2809 | Max       | 203.1 | 151.3 | 218.8 | 532.9 | 825.7 | 883.7 | 823.2 | 802.8 |
|                    | $\bar{x}$ | 129.7 | 88.4  | 147.8 | 365.9 | 521.5 | 521.0 | 527.2 | 527.9 |
|                    | SD        | 22.4  | 15.8  | 21.8  | 54.7  | 90.1  | 92.2  | 90.9  | 91.0  |
|                    | Min       | 15.5  | 37.4  | 40.2  | 120.6 | 59.5  | 223.9 | 78.6  | 118.6 |
| -120kg<br>n = 1512 | Max       | 220.6 | 144.1 | 214.9 | 543.6 | 852.7 | 811.4 | 793.9 | 794.0 |
|                    | $\bar{x}$ | 131.5 | 89.7  | 146.4 | 367.6 | 512.9 | 511.9 | 513.8 | 516.5 |
|                    | SD        | 24.6  | 17.0  | 23.2  | 58.9  | 94.8  | 95.3  | 95.7  | 95.0  |
|                    | Min       | 35.2  | 35.2  | 35.2  | 105.6 | 133.7 | 198.3 | 49.3  | 86.0  |
| 120+kg<br>n = 1001 | Max       | 261.6 | 152.6 | 229.1 | 593.8 | 865.1 | 820.1 | 795.9 | 800.7 |
|                    | $\bar{x}$ | 136.3 | 92.7  | 145.8 | 374.8 | 500.3 | 496.5 | 489.2 | 497.4 |
|                    | SD        | 28.7  | 18.9  | 23.9  | 65.5  | 103.2 | 100.1 | 96.9  | 100.5 |
|                    | Min       | 28.5  | 28.8  | 49.9  | 148.2 | 107.0 | 148.6 | 107.8 | 152.4 |

SW: Squat Wilks Points, BW: Bench press Wilks Points, DW: Deadlift Wilks Points, SIPF: Squat IPF Points, BIPF: Bench press IPF Points, DIPF: Deadlift IPF Points, TIPF: Total IPF Points

**Table 7.** Men’s Equipped Absolute Weight Lifted, Ratios and % of the Lift on the Total

| Category          |           | S (kg) | B (kg) | D (kg) | T (kg) | SR  | BR  | DR  | TR   | S%   | B%   | D%   |
|-------------------|-----------|--------|--------|--------|--------|-----|-----|-----|------|------|------|------|
| -59kg<br>n = 93   | Max       | 295.0  | 200.0  | 270.0  | 765.0  | 5.1 | 3.4 | 4.6 | 13.2 | 48.4 | 60.1 | 46.5 |
|                   | $\bar{x}$ | 197.9  | 134.1  | 196.9  | 528.9  | 3.4 | 2.3 | 3.4 | 9.1  | 37.2 | 25.5 | 37.3 |
|                   | SD        | 48.7   | 32.3   | 42.5   | 112.9  | 0.8 | 0.5 | 0.7 | 1.9  | 3.6  | 4.6  | 3.7  |
|                   | Min       | 50.0   | 50.0   | 70.0   | 225.0  | 0.9 | 0.9 | 1.2 | 4.1  | 16.6 | 11.4 | 23.3 |
| -66kg<br>n = 163  | Max       | 320.0  | 221.5  | 300.0  | 815.5  | 4.9 | 3.4 | 4.6 | 12.4 | 42.0 | 50.0 | 51.2 |
|                   | $\bar{x}$ | 209.6  | 144.5  | 211.7  | 565.7  | 3.2 | 2.2 | 3.3 | 8.7  | 36.7 | 25.5 | 37.9 |
|                   | SD        | 54.6   | 37.2   | 39.7   | 123.6  | 0.8 | 0.6 | 0.6 | 1.8  | 3.2  | 3.3  | 3.4  |
|                   | Min       | 55.0   | 50.0   | 95.0   | 215.0  | 0.9 | 0.8 | 1.5 | 3.6  | 25.0 | 18.5 | 25.0 |
| -74kg<br>n = 330  | Max       | 355.0  | 245.5  | 322.5  | 882.5  | 4.9 | 3.3 | 4.4 | 12.0 | 41.9 | 70.8 | 51.4 |
|                   | $\bar{x}$ | 229.2  | 158.6  | 230.5  | 618.4  | 3.1 | 2.2 | 3.2 | 8.5  | 36.8 | 25.7 | 37.5 |
|                   | SD        | 51.1   | 35.8   | 39.9   | 116.2  | 0.7 | 0.5 | 0.5 | 1.5  | 2.8  | 3.8  | 3.1  |
|                   | Min       | 45.0   | 42.5   | 50.0   | 180.0  | 0.6 | 0.6 | 0.7 | 2.5  | 14.6 | 15.9 | 14.6 |
| -83kg<br>n = 455  | Max       | 380.0  | 305.5  | 342.5  | 955.0  | 4.6 | 3.7 | 4.2 | 11.6 | 45.9 | 50.0 | 55.1 |
|                   | $\bar{x}$ | 241.4  | 166.9  | 241.4  | 649.8  | 3.0 | 2.1 | 3.0 | 8.0  | 36.9 | 25.6 | 37.5 |
|                   | SD        | 58.1   | 43.4   | 42.5   | 131.2  | 0.7 | 0.5 | 0.5 | 1.5  | 3.1  | 3.8  | 3.7  |
|                   | Min       | 75.0   | 55.0   | 90.0   | 250.0  | 0.9 | 0.7 | 1.1 | 3.3  | 16.6 | 11.9 | 25.0 |
| -93kg<br>n = 605  | Max       | 395.5  | 301.5  | 357.5  | 1025.5 | 4.4 | 3.3 | 3.9 | 11.3 | 43.9 | 72.2 | 46.8 |
|                   | $\bar{x}$ | 259.8  | 182.0  | 254.5  | 696.2  | 2.9 | 2.0 | 2.8 | 7.7  | 37.0 | 26.1 | 36.8 |
|                   | SD        | 57.8   | 42.5   | 41.2   | 128.6  | 0.6 | 0.4 | 0.4 | 1.3  | 2.9  | 3.8  | 3.3  |
|                   | Min       | 25.0   | 65.0   | 50.0   | 155.0  | 0.3 | 0.8 | 0.6 | 1.8  | 13.9 | 17.1 | 13.9 |
| -105kg<br>n = 594 | Max       | 445.5  | 324.0  | 380.0  | 1092.5 | 4.2 | 3.1 | 3.7 | 10.5 | 44.3 | 61.8 | 45.7 |
|                   | $\bar{x}$ | 276.0  | 195.8  | 266.8  | 738.7  | 2.7 | 1.9 | 2.6 | 7.3  | 37.2 | 26.4 | 36.4 |
|                   | SD        | 59.3   | 45.4   | 42.2   | 133.7  | 0.6 | 0.4 | 0.4 | 1.3  | 2.7  | 3.5  | 3.2  |
|                   | Min       | 50.0   | 50.0   | 50.0   | 150.0  | 0.5 | 0.5 | 0.5 | 1.6  | 19.1 | 15.7 | 19.1 |
| -120kg<br>n = 409 | Max       | 425.0  | 330.0  | 420.0  | 1130.0 | 3.8 | 2.9 | 4.0 | 9.9  | 45.8 | 65.1 | 45.9 |
|                   | $\bar{x}$ | 297.6  | 215.0  | 277.7  | 790.4  | 2.6 | 1.9 | 2.4 | 6.9  | 37.4 | 27.2 | 35.4 |
|                   | SD        | 63.8   | 47.9   | 43.6   | 140.4  | 0.5 | 0.4 | 0.4 | 1.2  | 2.9  | 3.8  | 3.3  |
|                   | Min       | 75.0   | 67.5   | 75.0   | 317.5  | 0.6 | 0.6 | 0.6 | 2.7  | 17.4 | 16.3 | 17.4 |
| 120+kg<br>n = 295 | Max       | 505.0  | 410.0  | 405.0  | 1272.5 | 3.5 | 2.6 | 3.0 | 9.0  | 48.4 | 50.9 | 47.1 |
|                   | $\bar{x}$ | 311.2  | 226.6  | 281.1  | 819.0  | 2.3 | 1.7 | 2.1 | 6.0  | 37.9 | 27.5 | 34.7 |
|                   | SD        | 71.4   | 60.7   | 50.5   | 167.4  | 0.5 | 0.4 | 0.4 | 1.2  | 2.9  | 3.7  | 3.7  |
|                   | Min       | 83.9   | 65.8   | 62.5   | 260.8  | 0.5 | 0.4 | 0.5 | 1.6  | 17.5 | 18.4 | 13.4 |

S: Squat, B: Bench, D: Deadlift, T: Total, SR: Squat Ratio, BR: Bench Ratio, DR: Deadlift Ratio, TR: Total Ratio, S%: Squat percentage on the total, B%: Bench press percentage on the total, D%: Deadlift percentage on the total

**Table 8.** Men's Equipped Wilks and IPF Formula points

| Category          |           | SW    | BW    | DW    | TW    | SIPF  | BIPF  | DIPF  | TIPF  |
|-------------------|-----------|-------|-------|-------|-------|-------|-------|-------|-------|
| -59kg<br>n = 93   | Max       | 259.0 | 175.6 | 237.1 | 671.7 | 791.2 | 815.8 | 727.3 | 797.6 |
|                   | $\bar{x}$ | 173.7 | 117.8 | 173.0 | 464.5 | 573.7 | 602.4 | 534.8 | 573.2 |
|                   | SD        | 41.3  | 27.5  | 36.0  | 94.9  | 105.3 | 100.4 | 109.3 | 103.1 |
|                   | Min       | 44.0  | 43.6  | 61.6  | 208.8 | 242.9 | 327.0 | 200.3 | 296.0 |
| -66kg<br>n = 163  | Max       | 251.9 | 176.1 | 236.1 | 640.3 | 777.4 | 798.9 | 757.9 | 772.5 |
|                   | $\bar{x}$ | 166.7 | 114.9 | 168.5 | 450.1 | 557.3 | 577.6 | 539.7 | 562.0 |
|                   | SD        | 42.6  | 28.9  | 30.6  | 95.7  | 110.0 | 103.9 | 98.0  | 105.5 |
|                   | Min       | 46.7  | 42.4  | 79.0  | 182.4 | 248.8 | 320.3 | 255.9 | 267.3 |
| -74kg<br>n = 330  | Max       | 257.9 | 176.9 | 234.6 | 638.2 | 794.2 | 782.5 | 774.9 | 774.2 |
|                   | $\bar{x}$ | 166.9 | 115.5 | 167.9 | 450.2 | 557.7 | 566.7 | 553.4 | 564.4 |
|                   | SD        | 36.6  | 25.6  | 28.3  | 82.6  | 95.1  | 90.1  | 94.8  | 92.1  |
|                   | Min       | 32.7  | 30.9  | 36.3  | 130.7 | 208.8 | 266.5 | 115.6 | 208.2 |
| -83kg<br>n = 455  | Max       | 253.9 | 204.4 | 229.8 | 639.6 | 780.9 | 860.0 | 779.2 | 775.3 |
|                   | $\bar{x}$ | 163.4 | 113.0 | 163.5 | 439.9 | 546.4 | 546.0 | 549.0 | 552.1 |
|                   | SD        | 38.4  | 28.8  | 28.0  | 86.3  | 99.6  | 99.0  | 96.8  | 96.4  |
|                   | Min       | 50.2  | 39.0  | 61.0  | 177.2 | 251.5 | 293.2 | 196.3 | 259.4 |
| -93kg<br>n = 605  | Max       | 251.3 | 191.4 | 225.3 | 651.6 | 768.0 | 797.5 | 773.4 | 783.8 |
|                   | $\bar{x}$ | 165.3 | 115.8 | 162.0 | 443.2 | 546.2 | 542.8 | 549.3 | 551.5 |
|                   | SD        | 36.0  | 26.4  | 25.6  | 79.5  | 92.4  | 87.9  | 90.5  | 88.2  |
|                   | Min       | 16.3  | 42.5  | 32.0  | 101.3 | 162.6 | 298.0 | 91.6  | 171.6 |
| -105kg<br>n = 594 | Max       | 266.2 | 194.4 | 227.8 | 655.7 | 789.3 | 779.8 | 783.4 | 774.3 |
|                   | $\bar{x}$ | 167.2 | 118.6 | 161.6 | 447.4 | 542.3 | 537.1 | 547.4 | 547.7 |
|                   | SD        | 35.2  | 27.0  | 25.1  | 79.1  | 88.8  | 87.0  | 89.2  | 86.2  |
|                   | Min       | 31.3  | 31.3  | 31.3  | 94.0  | 199.3 | 253.4 | 86.8  | 161.1 |
| -120kg<br>n = 409 | Max       | 245.2 | 189.8 | 250.9 | 650.0 | 718.6 | 738.0 | 865.5 | 743.8 |
|                   | $\bar{x}$ | 173.3 | 125.2 | 161.7 | 460.2 | 544.4 | 539.6 | 540.6 | 547.8 |
|                   | SD        | 36.6  | 27.5  | 25.0  | 80.2  | 89.4  | 85.0  | 88.8  | 85.1  |
|                   | Min       | 43.2  | 39.1  | 43.2  | 183.9 | 220.4 | 268.5 | 113.8 | 249.5 |
| 120+kg<br>n = 295 | Max       | 274.1 | 222.5 | 220.7 | 690.7 | 716.7 | 736.6 | 708.0 | 721.0 |
|                   | $\bar{x}$ | 174.6 | 127.1 | 157.8 | 459.6 | 522.9 | 515.1 | 506.4 | 520.4 |
|                   | SD        | 39.1  | 33.3  | 27.9  | 91.6  | 89.0  | 93.5  | 97.2  | 90.9  |
|                   | Min       | 46.0  | 36.1  | 35.2  | 143.0 | 214.0 | 241.0 | 78.0  | 187.6 |

SW: Squat Wilks Points, BW: Bench press Wilks Points, DW: Deadlift Wilks Points, SIPF: Squat IPF Points, BIPF: Bench press IPF Points, DIPF: Deadlift IPF Points, TIPF: Total IPF Points
